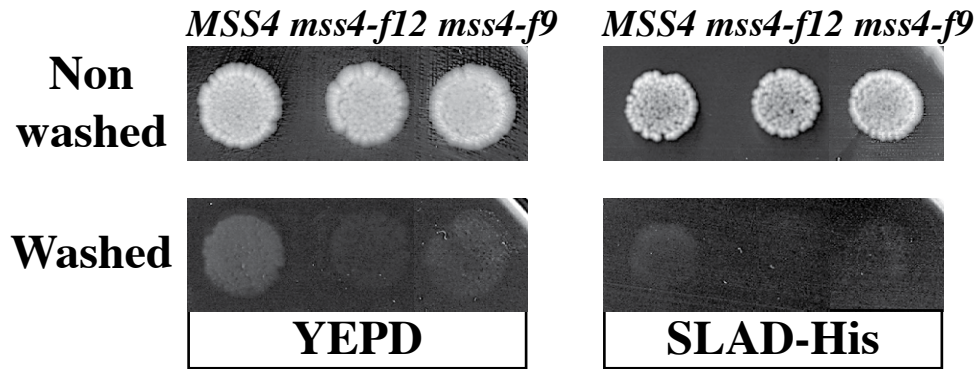

**Fig. S1. The *mss4-f9* and *mss4-f12* mutants are defective for haploid invasive growth in glucose and low ammonia media.** Indicated strains were spotted on YEPD and SLAD-His media and grown for 5 days. Cells on the surface of the agar were washed off revealing cells that had invaded the agar surface. Spots are from same agar plate. Similar results were observed in 2 independent experiments and representative images are shown.

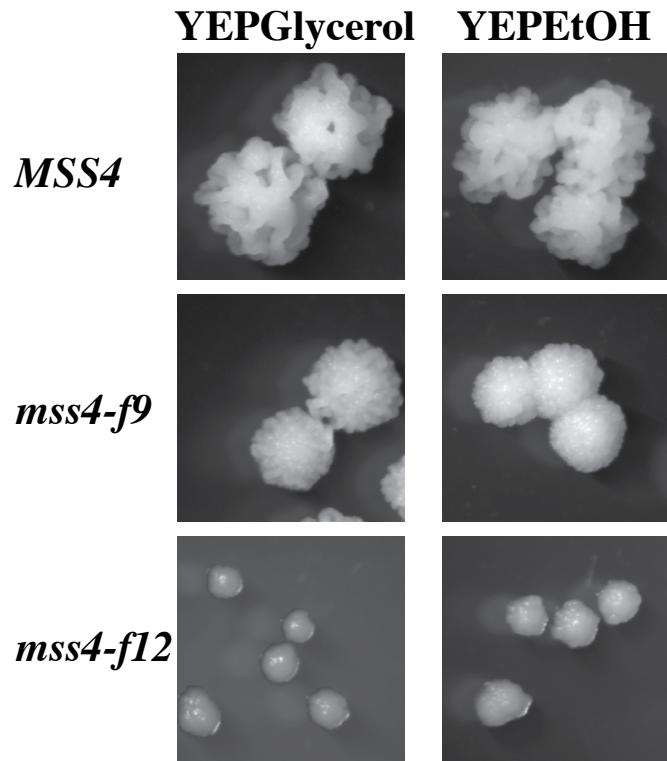

**Fig. S2. *mss4* mutants are defective in colony crenelation on glycerol and EtOH containing media.** Enlarged images of colonies of indicated strains grown on YEPGlycerol and YEPEtOH media for 5 days are shown. Similar results were observed in 3 independent experiments and representative images are shown.

**A**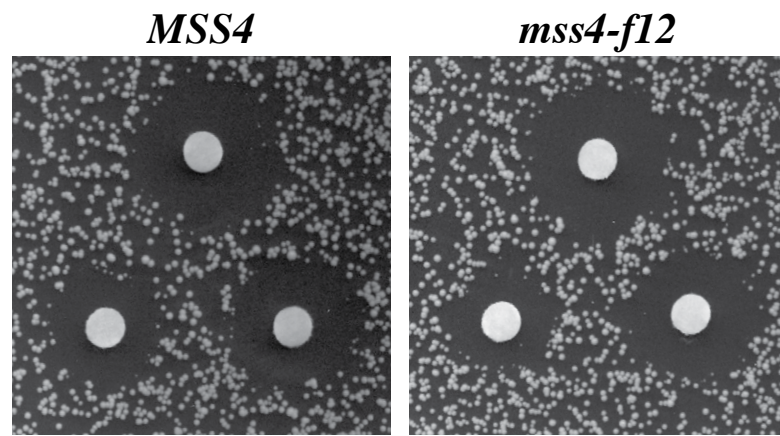**B**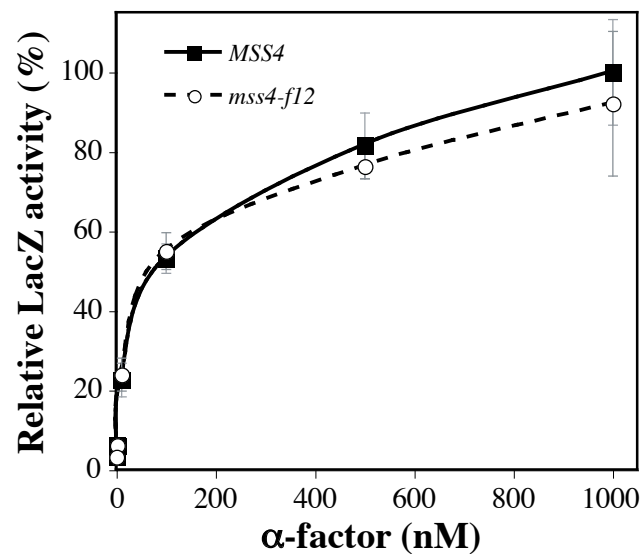

**Fig. S3. *mss4-f12* cells respond to mating pheromone.** *mss4-f12* cells arrest growth in the presence of mating pheromone similar to wild-type cells.  $\alpha$ -factor (1, 0.5, and 0.2  $\mu$ g) was spotted on filters placed on a lawn of the indicated *MATa* strain. Plates were incubated for 2 days. Measurements of the halo diameter indicated <5% difference between *mss4-f12* and *MSS4* halos. Similar results were observed in 2 independent experiments with 2 independent *mss4-f12* and *MSS4* strains. B) *mss4-f12* cells induce the mating-specific *FUS1* gene similar to wild-type cells. Cells containing a *FUS1-lacZ* plasmid (pSG231) were incubated with the indicated  $\alpha$ -factor concentration for 1 h and LacZ activity was determined. Values were normalized to the wild-type treated with 1000 nM  $\alpha$ -factor (0.48  $\beta$ -galactosidase units [ $\mu$ g protein] $^{-1}$  min $^{-1}$ ) and are the averages of two independent experiments each with two clones, each in duplicate and triplicate determinations, s.d. indicated.

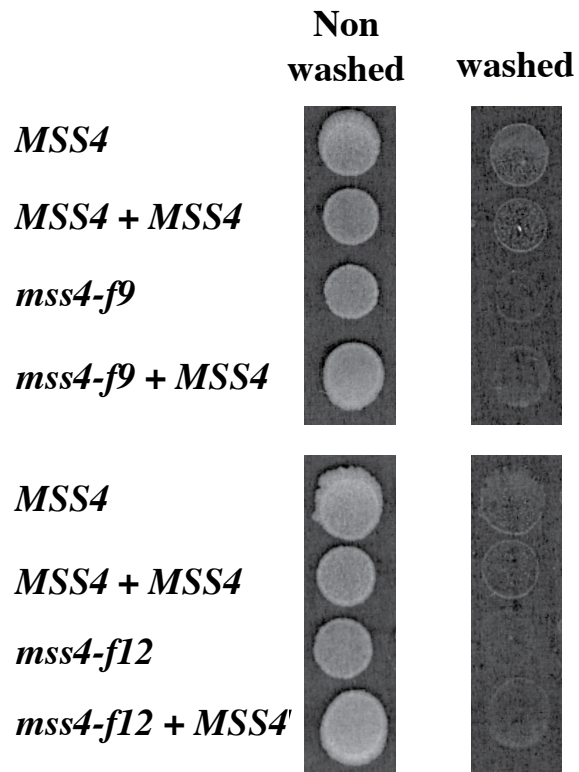

**Fig. S4. *Mss4* mutant invasive growth defect is recessive.** Complementation of the invasive growth defect was examined using an *mss4* $\Delta$  strain carrying either *MSS4*, *mss4-f9* or *mss4-f12* (RAY1986, RAY1991 and RAY2005, respectively) with or without the p415MSS4pMSS4. Indicated strains were grown on YEPD media for 5 days and invasive growth was assessed as in Fig. S1. Similar results were observed in 2 independent experiments and representative images are shown.

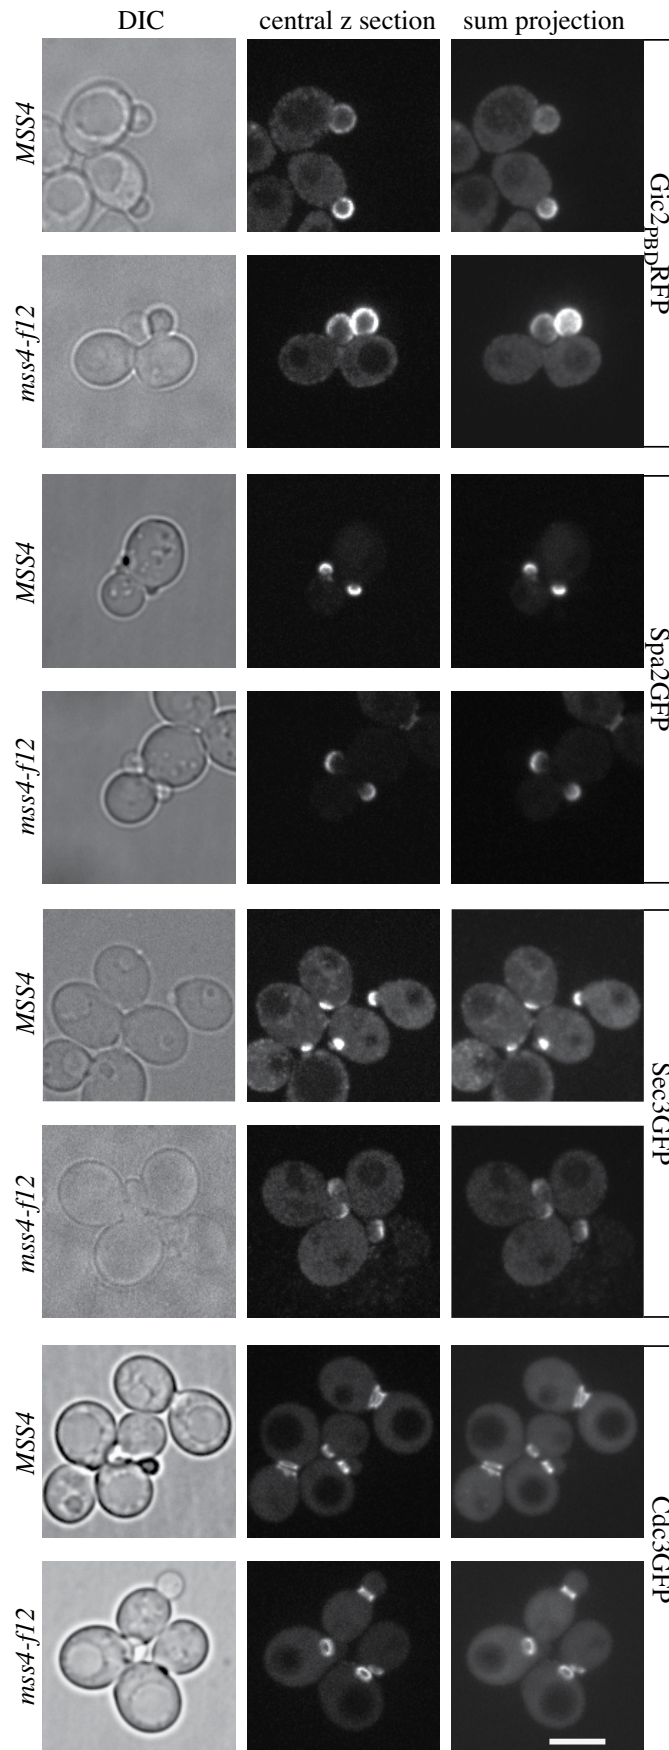

**Fig. S5. Active Cdc42p, polarisome, exocyst and septin subunits localization is unaffected in *mss4-fl2* cells.** Indicated strains expressing the indicated RFP/GFP fusion protein were grown in selective media with 2% glucose. Spinning disk confocal fluorescence and DIC images were taken and central z-sections and sum projections (8-12 z-sections) of representative cells are shown. Similar results were observed in 3 independent experiments.

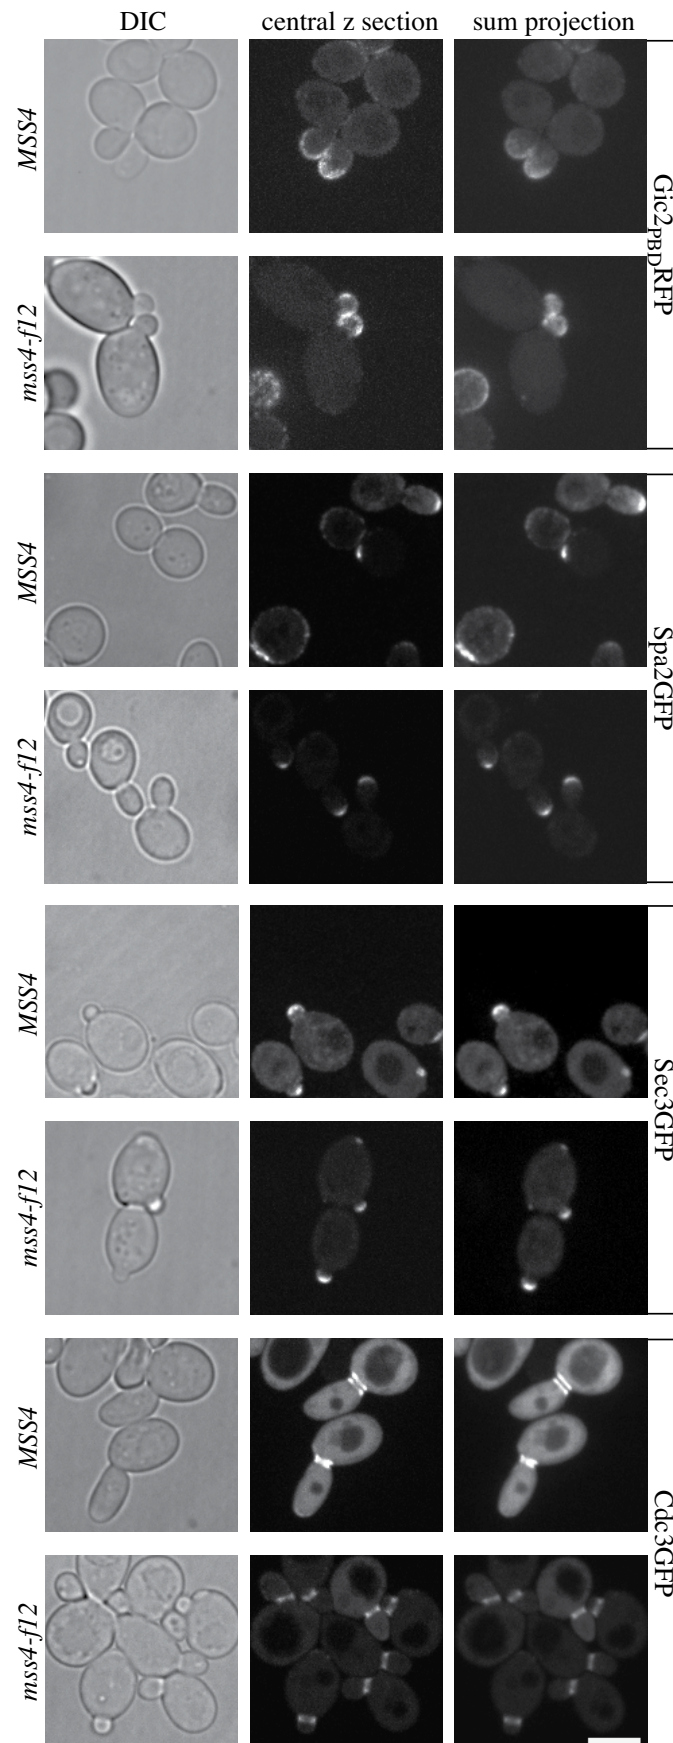

**Fig. S6. Active Cdc42p, polarisome, exocyst and septin subunits localization is unaffected in *mss4-f12* cells in limiting glucose.** Indicated strains expressing the indicated RFP/GFP fusion protein grown in selective media were back diluted into media containing 0.2% glucose and grown for an additional 6-7 hr. Spinning disk confocal fluorescence and DIC images were taken and central z-sections and sum projections (8-12 z-sections) of representative cells are shown. Similar results were observed in 2 independent experiments.

**A**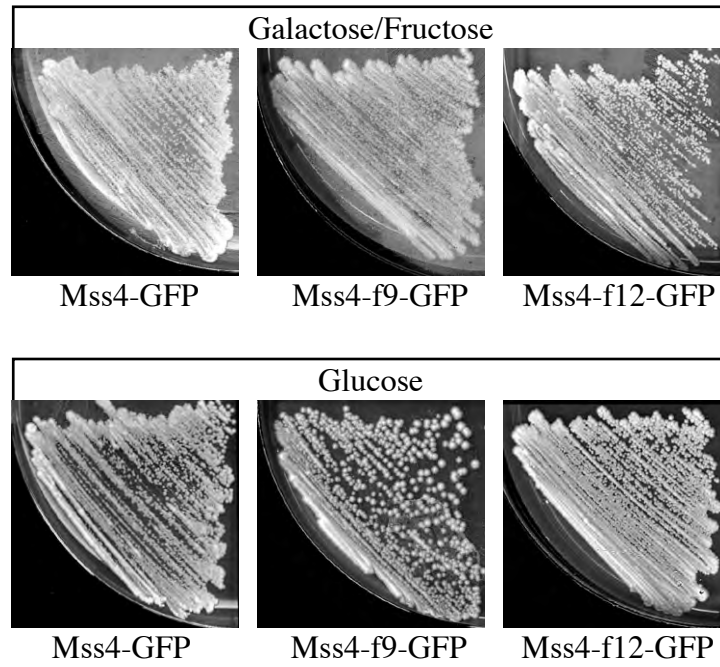**B**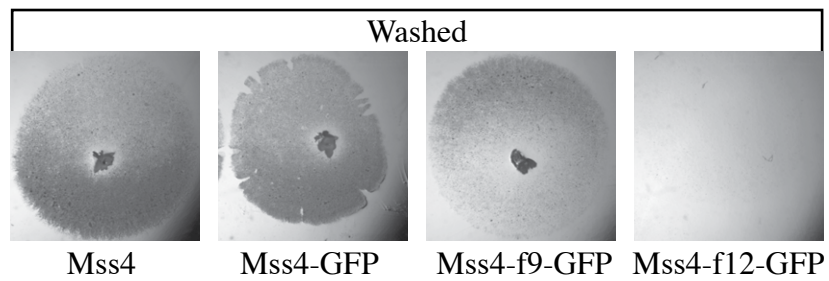

**Fig. S7. Mss4, Mss4-f9 and Mss4-f12 GFP fusions are functional.** A) RAY1885 carrying Mss4-GFP, Mss4-f9-GFP or Mss4-f12-GFP were grown on galactose or glucose containing media for 2 days. B) An *mss4Δ* strain carrying Mss4, Mss4-GFP, Mss4-f9-GFP or Mss4-f12-GFP was grown on YEP0.2%D media for 5 days and invasive growth was assessed as in Fig. S1.

Table S1. Yeast strains used in this study

| Strain   | Genotype                                                                                                                                        |                        |
|----------|-------------------------------------------------------------------------------------------------------------------------------------------------|------------------------|
| 10560-6B | <i>MAT ura3-52 trp1::hisG leu2::hisG his3::hisG</i>                                                                                             | (Roberts et al., 1997) |
| JY426    | <i>MATa, leu2-3,-112 ura3-52 his4-34 fus1- 1 fus2- 3</i>                                                                                        | Cold Spring Harbor     |
| SEY6211  | <i>MATa, leu2-3,-112 ura3-52 his3- 200 trp1- 901 ade2 suc2- 9</i>                                                                               | S. Emr                 |
| RAY876   | SEY6211 <i>URA3</i>                                                                                                                             | This study             |
| RAY1563  | JY426 with pRS406GFPBud1                                                                                                                        | This study             |
| RAY1885  | 10560-6B <i>mss4- 1::HIS5Sp</i> with p416GALpMSS4                                                                                               | This study             |
| RAY1940  | 10560-6B <i>mss4- 1::HIS5Sp</i> with p414MSS4pMSS4GFP                                                                                           | This study             |
| RAY1941  | 10560-6B <i>mss4- 1::HIS5Sp</i> with p414MSS4pmss4f9GFP                                                                                         | This study             |
| RAY1942  | 10560-6B <i>mss4- 1::HIS5Sp</i> with p414MSS4pmss4f12GFP                                                                                        | This study             |
| RAY1945  | <i>MAT/a ura3-52/ura3-52 trp1::hisG/trp1::hisG leu2::hisG/leu2::hisG his3::hisG/his3::hisG mss4- 1::HIS5Sp/mss4- 1::HIS5Sp p414MSS4pMSS4</i>    | This study             |
| RAY1949  | <i>MAT/a ura3-52/ura3-52 trp1::hisG/trp1::hisG leu2::hisG/leu2::hisG his3::hisG/his3::hisG mss4- 1::HIS5Sp/mss4- 1::HIS5Sp p414MSS4pmss4f12</i> | This study             |
| RAY1986  | 10560-6B <i>mss4- 1::HIS5Sp</i> with p414MSS4pMSS4                                                                                              | This study             |
| RAY1990  | 10560-6B <i>mss4- 1::HIS5Sp</i> with p414MSS4pMSS4                                                                                              | This study             |
| RAY1991  | 10560-6B <i>mss4- 1::HIS5Sp</i> with p414MSS4pmss4f12                                                                                           | This study             |
| RAY1992  | 10560-6B <i>mss4- 1::HIS5Sp</i> with p414MSS4pmss4f12                                                                                           | This study             |
| RAY1993  | 10560-6B <i>mss4- 1::HIS5Sp URA3::GALpGFP-PH<sup>pic</sup>-PH<sup>pic</sup>-GFP</i> with p414MSS4pmss4f12                                       | This study             |
| RAY1999  | 10560-6B <i>mss4- 1::HIS5Sp URA3::GALpGFP-PH<sup>pic</sup>-PH<sup>pic</sup>-GFP</i> with p414MSS4pmss4f12                                       | This study             |
| RAY2001  | 10560-6B <i>mss4- 1::HIS5Sp URA3::GALpGFP-PH<sup>pic</sup>-PH<sup>pic</sup>-GFP</i> with p414MSS4pMSS4                                          | This study             |
| RAY2003  | 10560-6B <i>mss4- 1::HIS5Sp URA3::GALpGFP-PH<sup>pic</sup>-PH<sup>pic</sup>-GFP</i> with p414MSS4pMSS4                                          | This study             |
| RAY2005  | 10560-6B <i>mss4- 1::HIS5Sp</i> with p414MSS4pmss4f9                                                                                            | This study             |
| RAY2006  | 10560-6B <i>mss4- 1::HIS5Sp</i> with p414MSS4pmss4f9                                                                                            | This study             |
| RAY2012  | <i>MATa ura3-52 trp1::hisG leu2::hisG his3::hisG mss4- 1::HIS5Sp</i>                                                                            | This study             |

|         |                                                                                          |            |
|---------|------------------------------------------------------------------------------------------|------------|
|         | p414MSS4pMSS4                                                                            |            |
| RAY2013 | <i>MATa ura3-52 trp1::hisG leu2::hisG his3::hisG mss4- 1::HIS5Sp</i><br>p414MSS4pMSS4    | This study |
| RAY2014 | <i>MATa ura3-52 trp1::hisG leu2::hisG his3::hisG mss4- 1::HIS5Sp</i><br>p414MSS4pmss4f12 | This study |
| RAY2015 | <i>MATa ura3-52 trp1::hisG leu2::hisG his3::hisG mss4- 1::HIS5Sp</i><br>p414MSS4pmss4f12 | This study |



Table S2. Primers used in this study

| #  | Primer name       | Primer sequence                                                                         | Mutation | Restriction site |
|----|-------------------|-----------------------------------------------------------------------------------------|----------|------------------|
| 1  | Mss4pBamHI        | CGCGGATCCATGTCAGTCTTGCGATCAC                                                            |          |                  |
| 2  | Mss4mNotI         | ATAGTTAGCGGCCGCACTCAGTCTTTATAATTT<br>TTC                                                |          |                  |
| 3  | Mss4pSalI         | CGCCTTGTCGACCATCGTGAGTTAAGG                                                             |          |                  |
| 4  | Mss4pAatIIinostop | CCTAACCAGAAAAATTATAAAGACGTCGTGCG<br>GCCGCCACCGCGGTGG                                    |          |                  |
| 5  | Mss4mAatIIinostop | CCACCGCGGTGGCGGCCGCACGACGTCTTTATA<br>ATTTTTCTGGTTAGG                                    |          |                  |
| 6  | AatIIpGAyeGFP     | AAAGACGTTCGGAGCAGGTGCTGGTGCTGG                                                          |          |                  |
| 7  | ADHtNotI          | TCCCCGCGGTGGCGGCCGCGTTATCCCTAGCGG<br>ATCTG                                              |          |                  |
| 8  | Mss4C12pT1717C    | GATTTAAAAGGTCCCACATGGGGCCGTTTTACC<br>AATCTAGATAAAG                                      | S573P    | XbaI             |
| 9  | Mss4C12mT1717C    | CTTTATCTAGATTGGTAAAACGGCCCCATGTGG<br>GACCTTTTAAATC                                      | S573P    | XbaI             |
| 10 | Mss4KOp           | GTTTACACCCCCGAGACAGTTGCCCTATATCG<br>CTTTTCCCTATCAATAGTTTCTAACTCCGGTGGC<br>GGCCGCTCTAG   |          |                  |
| 11 | Mss4KOm           | ATTAAATCAAAGTAGATTAGACTGAGTACATA<br>GACGATAGGTTATTTACCTGTGCCCTACCCTCG<br>AGGTCGACGGTATC |          |                  |
| 12 | Mss4pNheI-3       | TCCCTATCAATAGTTTTCGCTAGCATGTCAGTCT<br>TGCGATCACAAC                                      |          | NheI             |
| 13 | Mss4mNheI-3       | GTTGTGATCGCAAGACTGACATGCTAGCGAAA<br>CTATTGATAGGGA                                       |          | NheI             |
| 14 | Mss4pBglII607     | TTACTAAACAAGCGCGTTTTCGAGGAGATCTTC<br>CAGAATATCGGC                                       |          | BglII            |
| 15 | Mss4mBglII607     | GCCGATATTCTGGAAGATCTCCTCGAAACGCGC<br>TTGTTTAGTAAA                                       |          | BglII            |
| 16 | Mss4pAatII1401    | GATTATTTGGTTTCGTTGACGTCCAAATACATT<br>TTGAGTGAGTTGA                                      |          | AatII            |
| 17 | Mss4mAatII1401    | TCAACTCACTCAAATGTATTTGGACGTCAACG<br>AAACCAAATAATC                                       |          | AatII            |

|    |                |                                                                    |                |       |
|----|----------------|--------------------------------------------------------------------|----------------|-------|
| 18 | Mss4pXhoI1804  | GAAAGATTTAAATTGGCTCGAGGAAGGTCAGA<br>AAATTAATTCGG                   |                | XhoI  |
| 19 | Mss4mXhoI1804  | CCGAATTTAATTTTCTGACCTTCCTCGAGCCAA<br>TTTAAATCTTTC                  |                | XhoI  |
| 20 | Mss4C9pA1768T  | GGCGAAAGATTGATCATATAGGCCTGTGATGA<br>GAGATCTAAATTGGC                | R590*          | BglII |
| 21 | Mss4C9mA1768T  | GCCAATTTAGATCTCTCATCACAGGCCTATATG<br>ATCAATCTTTCGCC                | R590*          | BglII |
| 22 | Mss4pAatII1767 | GGATAAAGAAAGGTTGGCGAAAGACGTCTCAT<br>ATAGGCCTGTGATGAAAGATTTAAATTGGC | R590D<br>S591V | AatII |
| 23 | Mss4mAatII1767 | GCCAATTTAAATCTTTCATCACAGGCCTATATG<br>AGACGTCTTTCGCCAACCTTCTTTATCC  | R590D<br>S591V | AatII |
| 24 | Mss4pAatIIstop | CCTAACCAGAAAAATTATAAAGACGTCTGAGT<br>GCGGCCGCCACCGCGGTGG            | *780V<br>781*  | AatII |
| 25 | Mss4mAatIIstop | CCACCGCGGTGGCGGCCGCACTCAGACGTCTTT<br>ATAATTTTTCTGGTTAGG            | *780V<br>781*  | AatII |
| 26 | Mss4C22pT1697A | CCACCACACTTAGACATTCACAATACTTATGAT<br>TTAAAAGGATCCATATGGGG          | I566N          | BamHI |
| 27 | Mss4C22mT1697A | CCCCATATGGATCCTTTTAAATCATAAGTATTG<br>TGAATGTCTAAGTGTGGTGG          | I566N          | BamHI |
| 28 | Mss4C22pC1721T | CTTATTTCCACCACATCTAGACATTCACAATAC<br>TTATGATTTAAAAGGTTC            | T574I          | XbaI  |
| 29 | Mss4C22mC1721T | GGAACCTTTTAAATCATAAGTATTGTGAATGTC<br>TAGATGTGGTGGAAATAAG           | T574I          | XbaI  |
| 30 | MSS4clone9p    | GCGAAAGATAGATCATATAGGCCTGTGATGAG<br>AGATTTAAATTGGCTTGAAGAAGGTCAG   | K597R          |       |
| 31 | MSS4clone9m    | CTGACCTTCTTCAAGCCAATTTAAATCTCTCAT<br>CACAGGCCTATATGATCTATCTTTCGC   | K597R          |       |

Table S3. Plasmids used in this study

| Plasmid                                                     | Vector        | Insert                                        | Source                      |
|-------------------------------------------------------------|---------------|-----------------------------------------------|-----------------------------|
| pGEX-6P                                                     | pGEX-6P       |                                               | Amersham                    |
| p406                                                        | pRS406        |                                               | (Sikorski and Hieter, 1989) |
| p415                                                        | pRS415        |                                               | (Sikorski and Hieter, 1989) |
| p416                                                        | pRS416        |                                               | (Sikorski and Hieter, 1989) |
| pCM188                                                      | pCM188        |                                               | (Gari et al., 1997)         |
| pBSLoxPHisSpLoxp                                            | pBS           | LoxPHis5SpLoxP                                | (Nern and Arkowitz, 1998)   |
| p406GALp                                                    | pRS406        | GAL1-10 promoter                              | This study                  |
| p416GALp                                                    | pRS416        | GAL1-10 promoter                              | This study                  |
| p416GalCdc24HAGFP                                           | pRS416Gal     | Cdc24HAGFP                                    | (Nern and Arkowitz, 2000a)  |
| p416GALpMSS4                                                | pRS416GALp    | MSS4                                          | This study                  |
| pCM188TetpMSS4                                              | pCM188        | Tetp-MSS4                                     | This study                  |
| p414MSS4pMSS4                                               | pRS414        | MSS4pMSS4                                     | This study                  |
| p415MSS4pMSS4                                               | pRS415        | MSS4pMSS4                                     | This study                  |
| p414MSS4pMSS4-AII                                           | pRS414        | MSS4pMSS4-AII                                 | This study                  |
| p414MSS4pMSS4GFP                                            | pRS414        | MSS4pMSS4GFP                                  | This study                  |
| p414MSS4pmss4f9GFP                                          | pRS414        | MSS4pmss4f9 GFP                               | This study                  |
| p414MSS4pmss4f12GFP                                         | pRS414        | MSS4pmss4f12GFP                               | This study                  |
| pExpARG-pADH1GFP-PH <sup>Ptc</sup> - PH <sup>Ptc</sup> -GFP | pExpARG-pADH1 | GFP-PH <sup>Ptc</sup> -PH <sup>Ptc</sup> -GFP | (Vernay et al., 2012)       |
| p406GALpGFP-PH <sup>Ptc</sup> -PH <sup>Ptc</sup> -GFP       | pRS406        | GFP-PH <sup>Ptc</sup> -PH <sup>Ptc</sup> -GFP | This study                  |
| p414MSS4pMSS4*                                              | pRS414        | MSS4pMSS4*                                    | This study                  |
| p414MSS4pmss4f9                                             | pRS414        | MSS4p-mss4-f9                                 | This study                  |
| p414MSS4pmss4f12                                            | pRS414        | MSS4pmss4-f12                                 | This study                  |

|                          |                 |                                     |                            |
|--------------------------|-----------------|-------------------------------------|----------------------------|
| p414MSS4pMSS4-590AII     | pRS414          | MSS4pMSS4-590AII                    | This study                 |
| p414MSS4pMSS4-590AII-AII | pRS414          | MSS4pMSS4-590AII-AII                | This study                 |
| p414MSS4pmss4f9          | pRS414          | MSS4pmss4f9                         | This study                 |
| pGEX-6PMSS4              | pGEX-6P         | MSS4                                | This study                 |
| Flo11 lacZ (B3782)       | YEp355          | 3 kbp- <i>FLO11::LacZ</i> in YEp355 | (Rupp et al., 1999)        |
| pSG231                   | <i>URA3</i> CEN | FUS1-LacZ                           | (Trueheart et al., 1987)   |
| YIp211-GIC2-PBD-RFP      | YIp211          | GIC2-PBD-1.5tdTomato                | (Tong et al., 2007)        |
| p406GFPBud1              | pRS406          | GFPBUD1                             | (Nern and Arkowitz, 2000b) |
| p406Spa2GFP              | pRS406          | Spa2                                | (Arkowitz and Lowe, 1997)  |
| p316Sec3GFP              | pRS316          | Sec3GFP                             | (Finger et al., 1998)      |
| p316Cdc3GFP              | pRS316          | Cdc3GFP                             | (Caviston et al., 2003)    |
| pSL1509                  | <i>URA3</i> CEN | <i>ste11-4</i>                      | (Stevenson et al., 1992)   |
